# Supplementary material for: Synthesis, structure, and properties of a 3D porous Zn(ii) MOF constructed from a terpyridine-based ligand
Source: Royal Society of Chemistry journal article supplement (doi:10.1039/c5ra27368d), 2016-01-01
Supplement: c5ra27368d1.pdf [file c5ra27368d1.pdf]

## Supplemental Material

### **Synthesis, structure, and properties of a 3D porous Zn(II) MOF constructed from a terpyridine-based ligand**

Wen Wang, Zhenyu Xiao, Huan Lin, Rongming Wang,\* Liangliang Zhang, Daofeng Sun\*

State Key Laboratory of Heavy Oil Processing, China University of Petroleum (East  
China), College of Science, China University of Petroleum (East China), Qingdao  
Shandong 266580, P. R. China.

E-mail: [rmwang@upc.edu.cn](mailto:rmwang@upc.edu.cn).

[dfsun@upc.edu.cn](mailto:dfsun@upc.edu.cn)

The 4'-(furan-2-yl)-[2,2':6',2''-terpyridine]-4,4''-dicarboxylic acid was prepared according to the reported procedures.<sup>[1]</sup>

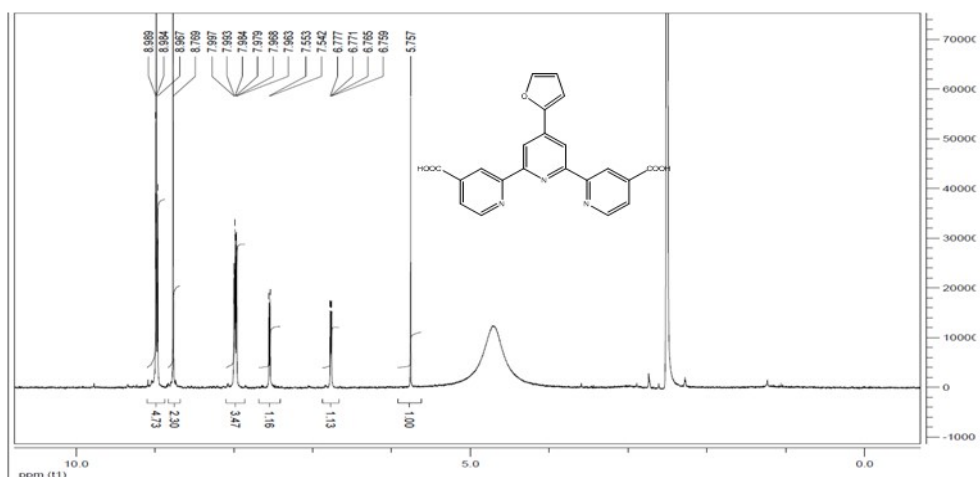

**Fig. S1** The  $^1\text{H}$  NMR of  $\text{H}_2\text{L}$  ligand.

**Table S1** Selected bond lengths ( $\text{\AA}$ ) and angles ( $^\circ$ ) for **1**

|           |            |           |             |           |             |
|-----------|------------|-----------|-------------|-----------|-------------|
| Zn1-O5    | 2.256 (9)  | Zn1-O6    | 2.235 (6)   | Zn1-O7    | 1.955 (4)   |
| Zn1-N1    | 2.175 (4)  | Zn1-N2    | 2.071 (4)   | Zn1-N3    | 2.159 (4)   |
| Zn2-O3    | 1.973 (3)  | Zn2-O1    | 1.945 (3)   | Zn2-N4    | 2.176 (4)   |
| Zn2-N5    | 2.082(4)   | Zn2-N6    | 2.224(4)    |           |             |
| O3-Zn2-N5 | 109.88(14) | O3-Zn2-N4 | 93.93 (16)  | O3-Zn2-N6 | 99.57 (16)  |
| O1-Zn2-O3 | 124.10(17) | O1-Zn2-N5 | 125.44 (16) | O1-Zn2-N4 | 106.16 (16) |
| O1-Zn2-N6 | 88.26 (17) | N5-Zn2-N4 | 75.30 (16)  | N5-Zn2-N6 | 74.87 (16)  |
| N4-Zn2-N6 | 149.93(17) | N3-Zn1-N1 | 150.00 (18) | N3-Zn1-O5 | 104.5 (2)   |
| N3-Zn1-O6 | 93.03 (18) | O7-Zn1-N3 | 94.96 (16)  | O7-Zn1-N2 | 132.84 (16) |
| O7-Zn1-N1 | 99.44 (16) | O7-Zn1-O5 | 87.17 (2)   | O7-Zn1-O6 | 142.3 (3)   |
| N2-Zn1-N3 | 75.11 (15) | N2-Zn1-N1 | 75.79 (16)  | N2-Zn1-O5 | 139.97 (18) |
| N2-Zn1-O6 | 84.8 (3)   | N1-Zn1-O5 | 102.4 (2)   | N1-Zn1-O6 | 91.47 (17)  |
| O6-Zn1-O5 | 55.2 (3)   |           |             |           |             |

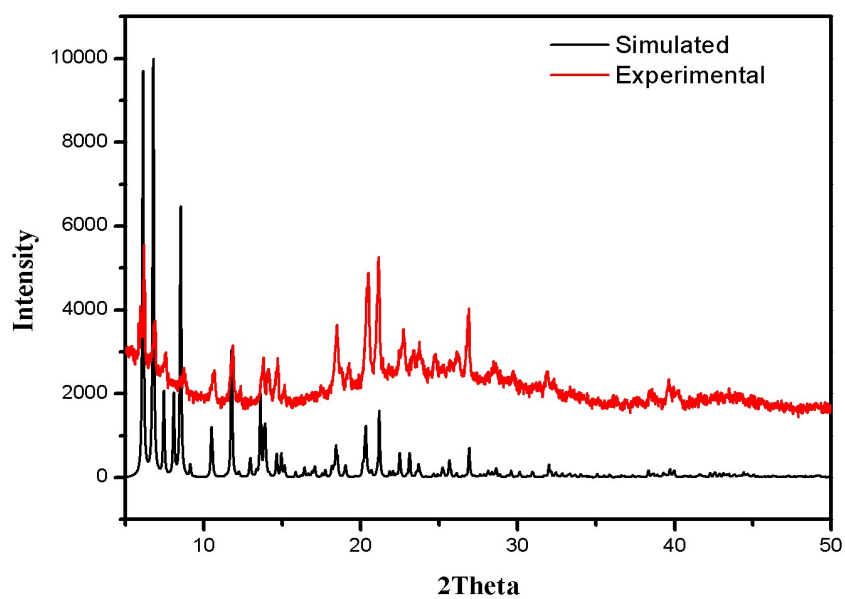

**Fig. S2** The powder XRD pattern and the simulated one from the single-crystal diffraction data for complex 1.

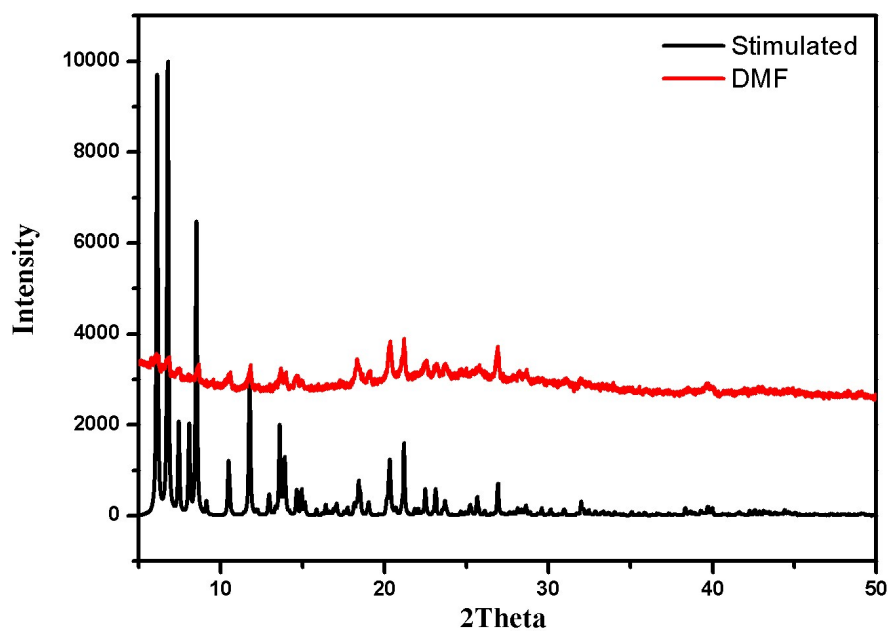

**Fig. S3** The PXRD patterns of complex 1 treated in DMF.

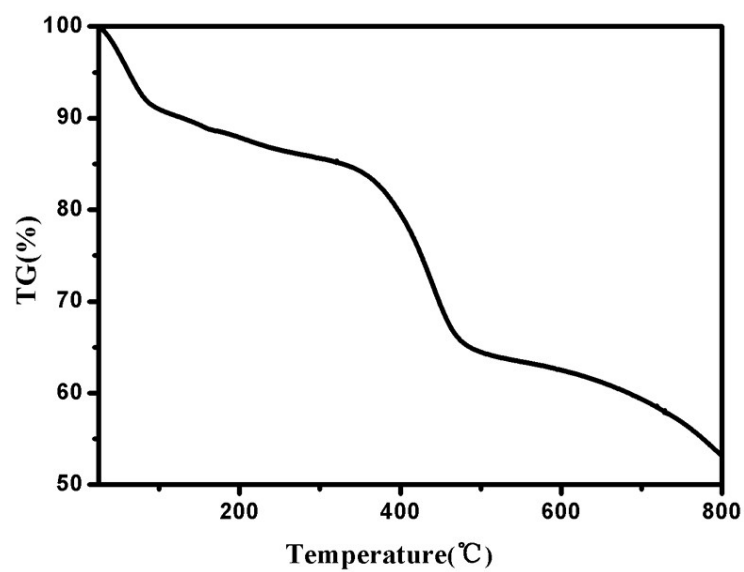

Fig. S4 TG curve of complex 1.

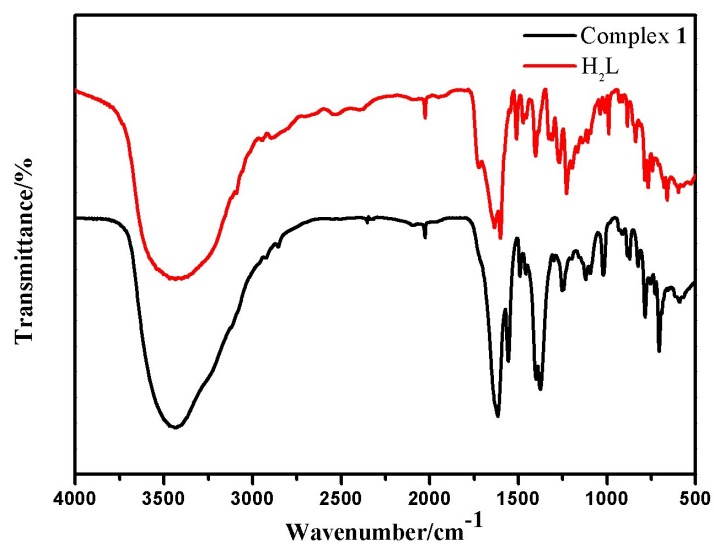

Fig. S5 IR spectrum of complex 1.

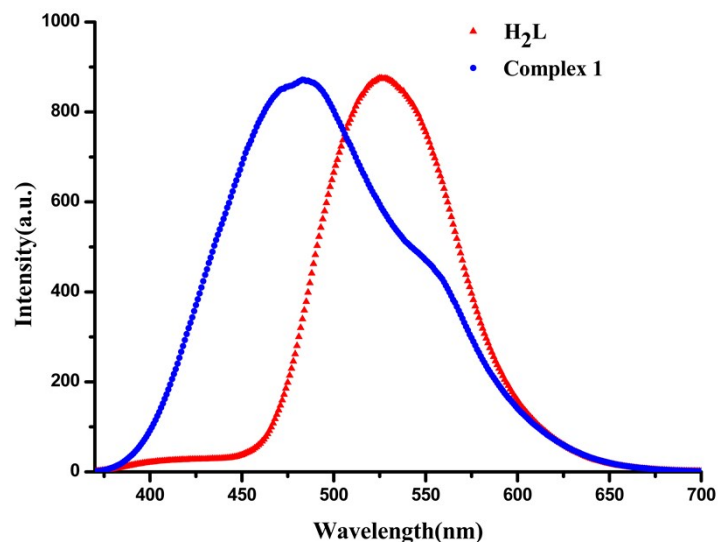

**Fig. S6** Room-temperature emission spectra of free ligand and complex 1.

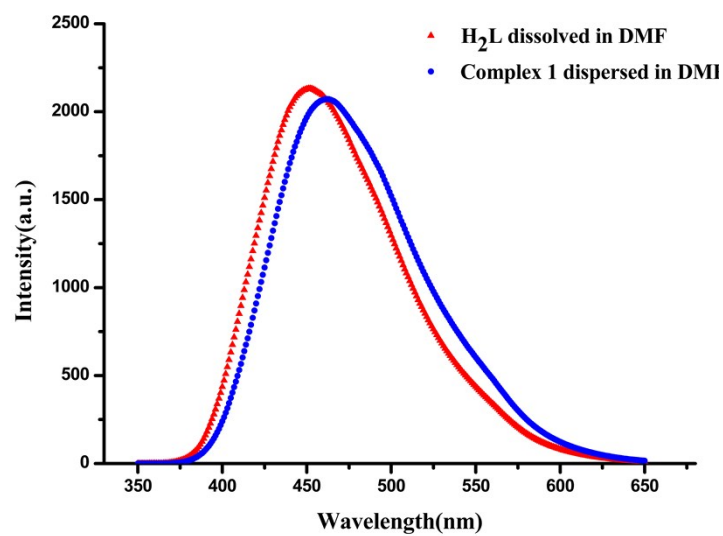

**Fig. S7** The emission spectra for H<sub>2</sub>L dissolved in DMF and complex 1 dispersed in DMF at room temperature.

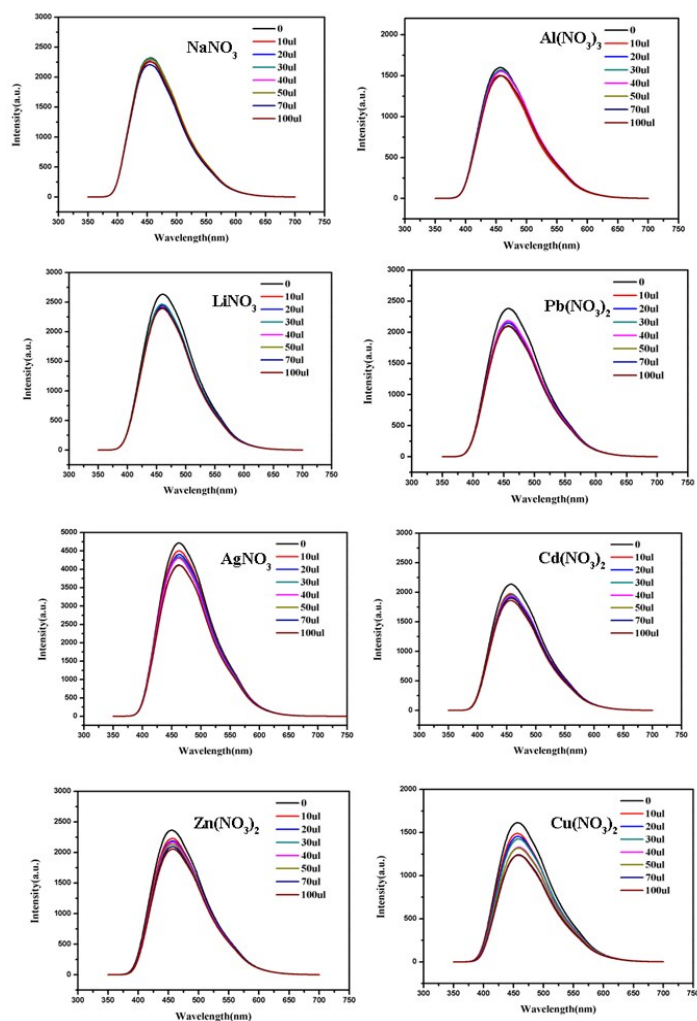

**Fig. S8** Emission intensity of complex **1** dispersed in DMF upon incremental addition of a  $M(\text{NO}_3)_x$  ( $M = \text{Cu}^{2+}, \text{Na}^+, \text{Al}^{3+}, \text{Ag}^+, \text{Cd}^{2+}, \text{Li}^+, \text{Zn}^{2+}, \text{Pb}^{2+}$ ) solution (1mM) in DMF.

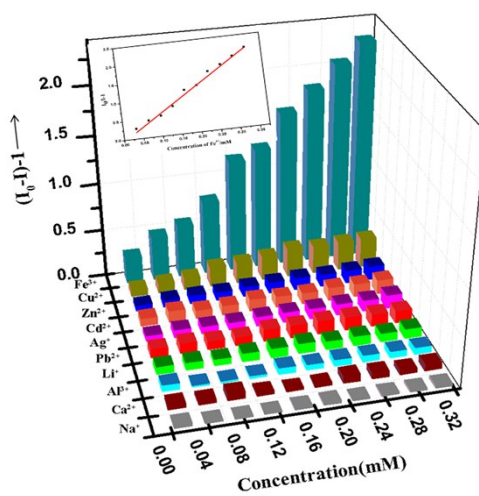

**Fig. S9** Corresponding Stern-Volmer plots of analytes. Insert: Stern-Volmer plot of  $I_0/I-1$  versus the  $\text{Fe}^{3+}$  concentration in DMF.

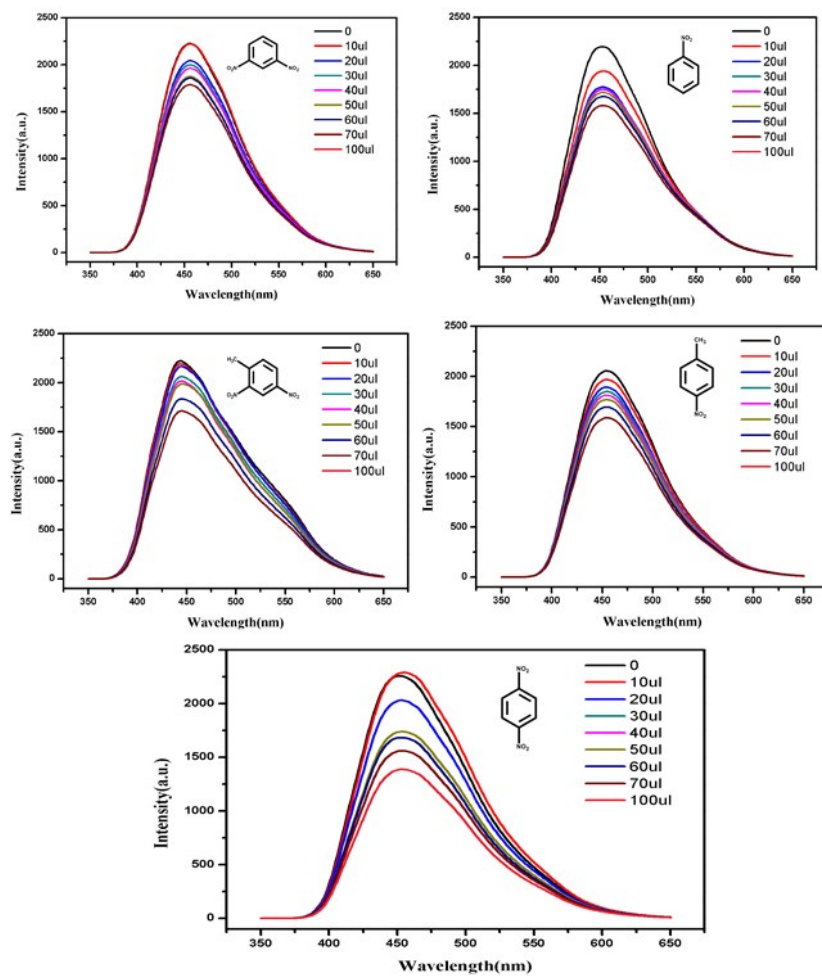

**Fig. S10** Effect on the emission spectra of complex **1** dispersed in DMF upon incremental addition of different analyte solutions (1,3-DNB, 2,4-DNT, 1,4-DNB, NB, 1-M-4-NB) solution (1 mM) in DMF

## References:

- [1] J. Dehaudt, J. Husson, Laurent Guyard, *Green Chem.*, 2011, **13**, 3337 .
